# Supplementary material
Source: Springer Nature journal article supplement (http://www.springermedizin.de/resource/supplementary/12891_2007_353_MOESM8_ESM.pdf/9511122)

## Survival of the Nottingham Total Shoulder Replacement Prosthesis in Patients with OA (1994-1997)

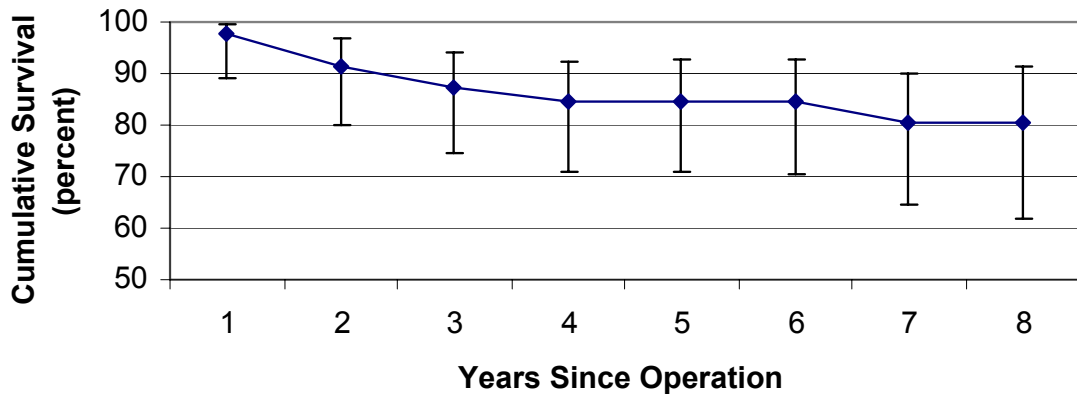

Supplement: MOESM8 [file 9511122]
